# Supplementary material
Source: PubMed Central journal article supplement (PMC7061757)
Supplement: ajcr0010-0454-f9.pdf [file ajcr0010-0454-f9.pdf]

## TLR4 activation leads to anti-EGFR therapy resistance in HNSCC

**Table S1.** The primer sequences for PCR

| gene  | Forward Primer (5'→3') | Reverse Primer (5'→3') |
|-------|------------------------|------------------------|
| EGFR  | GTGTGCCACCTGTGCCATCC   | GCCACCACCAGCAGCAAGAG   |
| TLR4  | TGGTGTGTCGGTCCTCAGTGTG | AGCCAGCAAGAAGCATCAGGTG |
| MyD88 | CGCCGCCTGTCTCTGTTCTTG  | GGTCCGCTTGTGTCTCCAGTTG |
| TRIF  | AGGACGCCATAGACCACTCAGC | CCAGGGGCAGGAAGGGGATG   |

**Table S2.** The sequences for the overexpressed cbl-b and src plasmid

| gene  | sequence                                                                                                                                                                                                                                                                                                                                                                                                                                                                                                                                                                                                                                                                                                                                                                                                                                                                                                                                                                                                                                                                                                                                                                                                                                                                                                                                                                                                                                                                                                                                                                                                                                                                                                                                                                                                                     |
|-------|------------------------------------------------------------------------------------------------------------------------------------------------------------------------------------------------------------------------------------------------------------------------------------------------------------------------------------------------------------------------------------------------------------------------------------------------------------------------------------------------------------------------------------------------------------------------------------------------------------------------------------------------------------------------------------------------------------------------------------------------------------------------------------------------------------------------------------------------------------------------------------------------------------------------------------------------------------------------------------------------------------------------------------------------------------------------------------------------------------------------------------------------------------------------------------------------------------------------------------------------------------------------------------------------------------------------------------------------------------------------------------------------------------------------------------------------------------------------------------------------------------------------------------------------------------------------------------------------------------------------------------------------------------------------------------------------------------------------------------------------------------------------------------------------------------------------------|
| cbl-b | atgggct atttgtgtg taatttcatt tggttcttgg gaataacgac tcacocggtt gatttaaaga aagaactaaa attccagatg gcaaaactcaa tgaatggcag aaaccctggg ggtc-gagggag gaaatccccg aaaaagctcga attttgggta ttattgatgc tattcaggat gcagttggac ccctaagca agctgcccga gatcgcagga ccgtggagaa gacttggagaa ctcatggaca aagtggtaag actgtgccc aaatcccaaac ttcagttgaa aatagccca ccatatatac ttgatattt gcctgataca tatcagcatt tacgacttat attgag-taaa tatgatgaca accagaaact tgcacaact agtggagaatg agtactttaa aatctacatt gatagcctta tgaaaaagtc aaaaaggcca ataagactct taaagaaagg caaggagaga atgtatgaag aacagtaca ggacagacga aatctcaaa aactgtccct tatctcagt cacatgctgg cagaaatcaa agcaatcttt cccaatggtc aattc-cagggg agataacttt cgtatcacia aagcagatgc tgcgaattc tggagaaagt tttttggaga caaaactatc gtaccatgga aagtattcag acagtgcctt catgaggtcc acca-gattag ctctggcctg gaagcaatgg ctctaaaac aacaattgat ttaacttga atgattacc ttcatgtttt gaatttata tttttaccag gctgtttcag ccttggggct ctattttcg gaattggaa ttcttagctg tgacacatcc aggttaccatg gcattttctca catatgatga agttaaagca cgactacaga aatatagac caaaccggga agctatattt tccggttaag ttgactcga ttgggacagt ggccatttgg ctatgtgact ggggatggga atatcttaca gaccatacct cataacaagc ccttattca agccctgatt gatggcagca gggaaaggatt ttatctttat cctgatggga gggattataa tctgatatta actggattat gtgaacctac acctatgac catataaaag ttacacagga acaatatgaa ttatattgtg aaatgggctc cacitttcag ctctgtaaga ttgtgcaga gaatgacaaa gatgtcaaga ttgagccttg tgggcatttg atgtgcaact ctgocctac ggcatggcag gagtgggag gtccgggctg ccctttctg cgtttgaaa taaaagggaac tgagccata atcgtggacc cctttgatcc aagagatgaa ggctccaggt gtgcagcat cattgaccc tttggcatgc cgatgctaga cttggacgac gatgatgac gtgaggagtc cttgatgatg aatcggttgg caaacgtccg aaagtgcact gacaggcaga actcaccagt cacatcaca ggtactctc ccttggcca gagaagaaa cccagcctg accactcca gatccacat ctaagcctgc caccctgccc tctcgcctg |
| src   | a tgggtagcaa caagagcaag cccaaggatg ccagccagcg gcgccgacg ctggagcccc ccgagaactg gcacggcctg ggccggggcg ctttccccg ctgcagacc ccagcaagc cagcctcggc cagcggccac cgcggcccca gcgcggcctt cgcocccgcg gccgcccagc ccaagctgtt cggagggctc aactcctcgg acaccgtac ctccc-gcag agggcggggc cgcctggccgg tggagtggac accttttgg ccctctatga ctatgagtct aggacggaga cagacctgtc ctcaagaaa ggccagcggc tccagattgt caa-caacaca gaggggagact ggtggctggc ccactcgtc agcacaggac agacaggcta catcccagc aactacgtgg cgcocctcga ctcatccag gctgaggagt ggtattttg caagatcacc agacgggagt cagagcgggt actgctcaat gcagagaacc cgagaggagc ctctcctg cgagaaagtg agaccacgaa aggtgctac tgcctctcag tctc-tgactt cgaacaagcc aaggggctca actggaagca ctacaagatc cgcaagctgg acagcggcgg ctctctacat acctcccga cccagttcaa cagcctcag cagctggtgg cctactact caaacagccc gatggcctgt gccaccgct caccacctg tgcaccagt ccaagccgca gactcagggc ctggccaagg atgcttggga gatccctcgg gactc-gctgc ggctggagggt caagctgggc cagggctgct ttggcgagggt gttggatgggg acctggaacg gtaccaccag gttggccatc aaaaacctga agcctggcac gatgtccca gaggccttc tgcaaggagc ccaggtcatg aagaagctga ggcatgagaa gctggtgagc ttgtatgctg tggtttcaga ggggcccatt tacatgta cggagtacat gtagcaagggg agttttcgg acctttcaca gggggagaca ggcaagtacc tgcggctgccc tcagctggtg gacatggctg ctacagatgc ctacggcatg gcgtacgtgg agcggatgaa ctacgtc-cac cgggacctc gtgcagccaa catcctggtg gggagagaacc tgggtgcaaa agtggccgac ttgggctgg ctgggctcat tgaagacaat gagtacagg cgcggcaagg ttgcaaaatc cccatcaagt ggagggctcc agaagctgccc ctctatggcc gttccacct caagctggac gttggtctc ttgggactc gctgactgag ctaccacaa agggacgggt gccctacct gggatggtga accgcgagggt gctggaccag gttggagcggg gctaccggat gccctgccc cggagatgct ccgagctcct gcacgacct atgtgccagt gctggcg-gaa gggagcctgag gaggcggcca ccttcgagta cctgcagggc ttctggagg actactcag gtcaccggag cccaggtacc agcccggga gaacctctg       |
